# Supplementary material
Source: publisher site journal article supplement (https://www.dovepress.com/article/579440)
Supplement: Supplementary file 1 [file 579440%20Revised%20Supplemental%20Table%201.docx]

**Supplemental Table 1 The Proportion of Antipsychotics in Overall Use**

| **Antipsychotic Name** | **N** | **%** |
| --- | --- | --- |
| Quetiapine | 138 | 53.29% |
| Olanzapine | 63 | 24.32% |
| Aripiprazole | 22 | 8.49% |
| Risperidone | 11 | 4.25% |
| Ziprasidone | 6 | 2.32% |
| Amisulpride | 5 | 1.93% |
| Sulpiride | 5 | 1.93% |
| Clozapine | 4 | 1.54% |
| Chlorpromazine | 2 | 0.77% |
| Perphenazine | 2 | 0.77% |
| Paliperidone | 1 | 0.39% |

**Note:** N represents the frequency of antipsychotic medication use, % represents the proportion of each medication in overall antipsychotics prescription.
